# Supplementary material for: DYRK1B blockade promotes tumoricidal macrophage activity in pancreatic cancer
Source: HighWire-hosted journal article supplement (doi:10.1136/gutjnl-2023-331854), 2024-06-04

## Flow cytometry gating strategies

### Total CD4<sup>+</sup> or CD8<sup>+</sup>

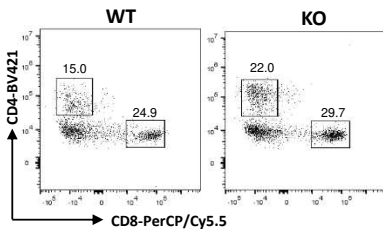

### IFN $\gamma$ <sup>+</sup>

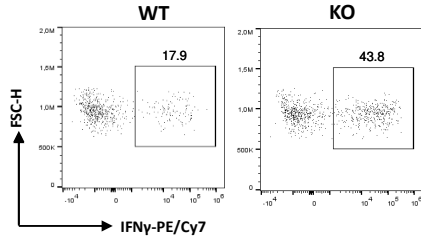

### TNF<sup>+</sup>

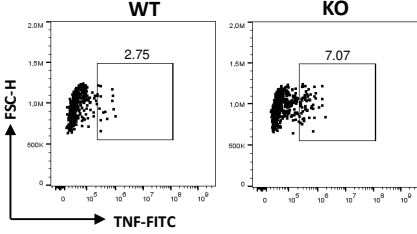

### Tbet<sup>+</sup>

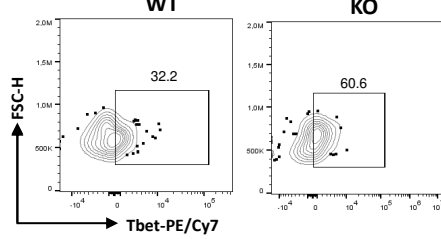

### ROR $\gamma$ t<sup>+</sup>

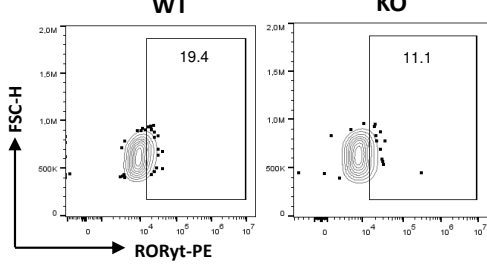

### CD4<sup>+</sup>/IFN $\gamma$ <sup>+</sup>

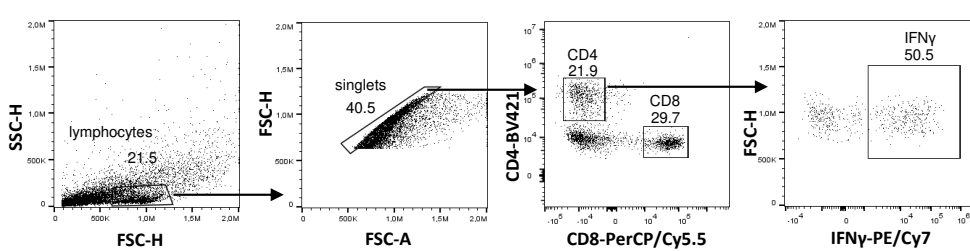

### F4/80-MHCII<sup>+</sup>

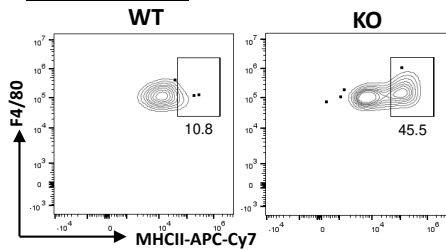

### F4/80-CD206<sup>+</sup>

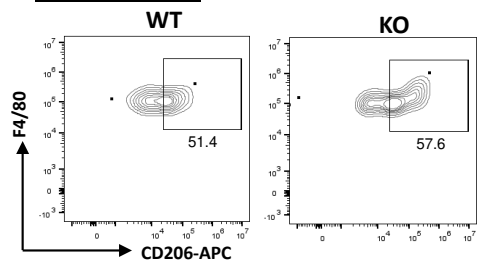

Supplement: gutjnl-2023-331854supp010_data_supplement.pdf [file gutjnl-2023-331854supp010_data_supplement.pdf]
