# Supplementary material for: DYRK1B blockade promotes tumoricidal macrophage activity in pancreatic cancer
Source: HighWire-hosted journal article supplement (doi:10.1136/gutjnl-2023-331854), 2024-06-04
Supplement: gutjnl-2023-331854supp011_data_supplement.pdf [file gutjnl-2023-331854supp011_data_supplement.pdf]

### **Reviewer access to submitted RNaseq data**

RNAseq data has been deposited at BioStudies/Array Express and can be accessed via the following links:

- E-MTAB-13666 (*Dyrk1b* WT/KO in mKpc4 cells)  
<https://www.ebi.ac.uk/biostudies/arrayexpress/studies/E-MTAB-13666?key=050421ec-ae16-4ad3-80b0-3b11f49a21ba>
- E-MTAB-13667 (Mouse allograft with *Dyrk1b* WT/KO mKpc4 cells)  
<https://www.ebi.ac.uk/biostudies/arrayexpress/studies/E-MTAB-13667?key=686b40d2-4f1c-4e29-bc1f-e62ce210e3b9>
- E-MTAB-13668 (Mouse BMDMs treated with SN from *Dyrk1b* WT/KO mKpc4 cells)  
<https://www.ebi.ac.uk/biostudies/arrayexpress/studies/E-MTAB-13668?key=62441f8c-e380-4613-85d8-84f9c27654d5>
