# Supplementary figures and images for: DYRK1B blockade promotes tumoricidal macrophage activity in pancreatic cancer
Source: HighWire-hosted journal article supplement (doi:10.1136/gutjnl-2023-331854), 2024-06-04

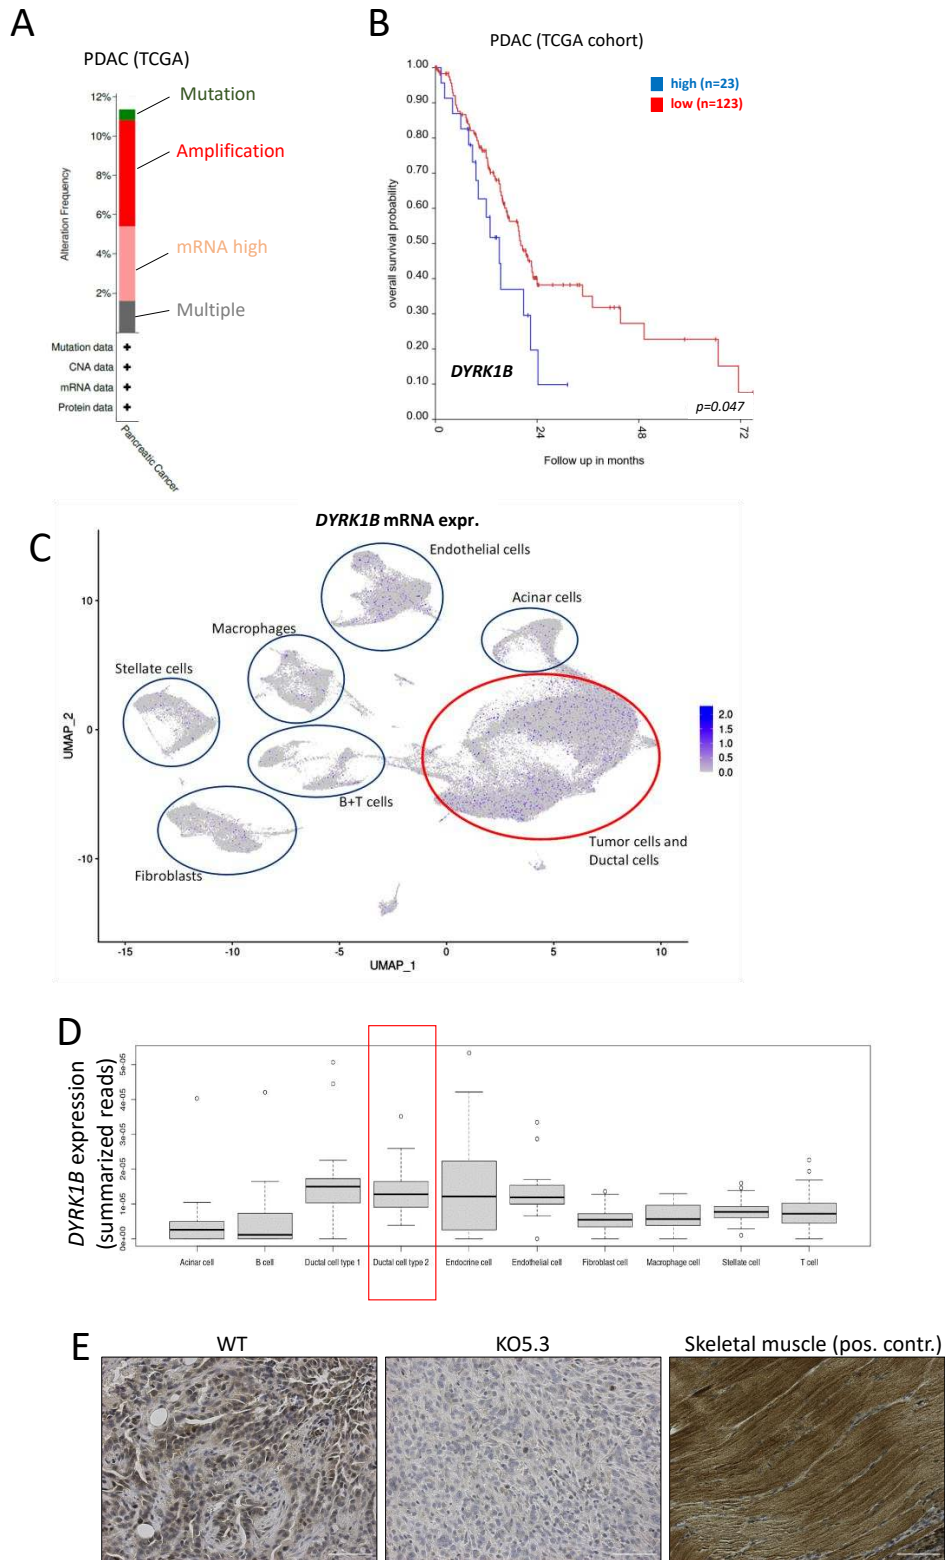

- Figure S1 -

Supplement: gutjnl-2023-331854supp002_data_supplement.pdf [file gutjnl-2023-331854supp002_data_supplement.pdf]

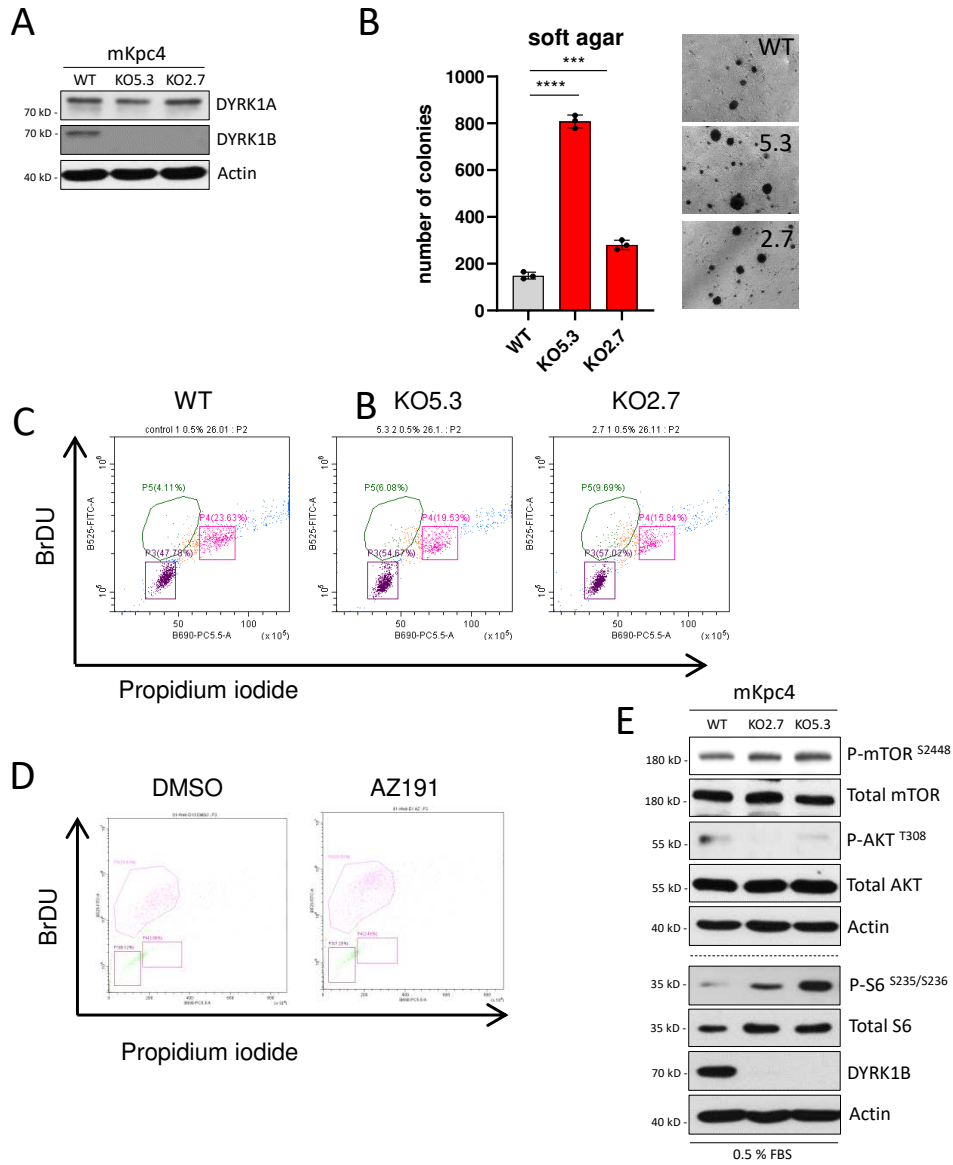

- Figure S2 -

Supplement: gutjnl-2023-331854supp003_data_supplement.pdf [file gutjnl-2023-331854supp003_data_supplement.pdf]

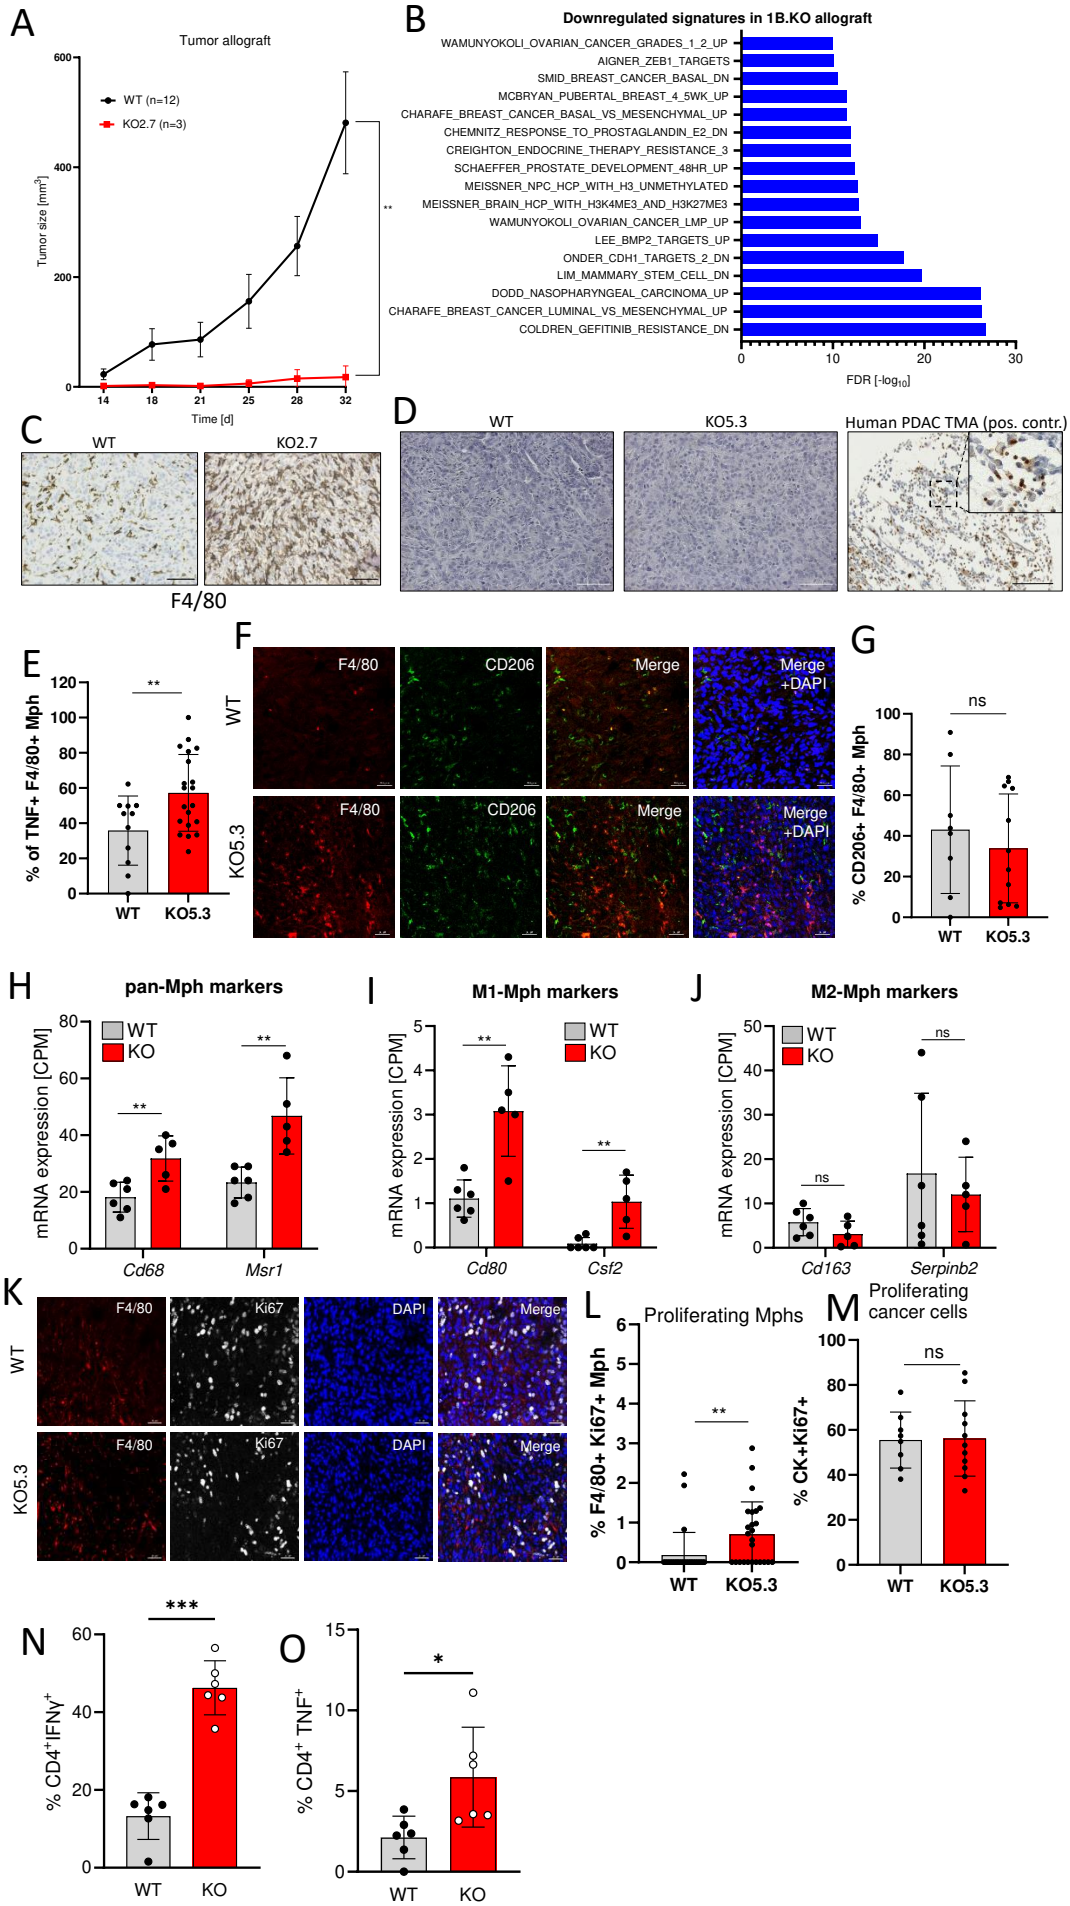

- Figure S3 -

Supplement: gutjnl-2023-331854supp004_data_supplement.pdf [file gutjnl-2023-331854supp004_data_supplement.pdf]

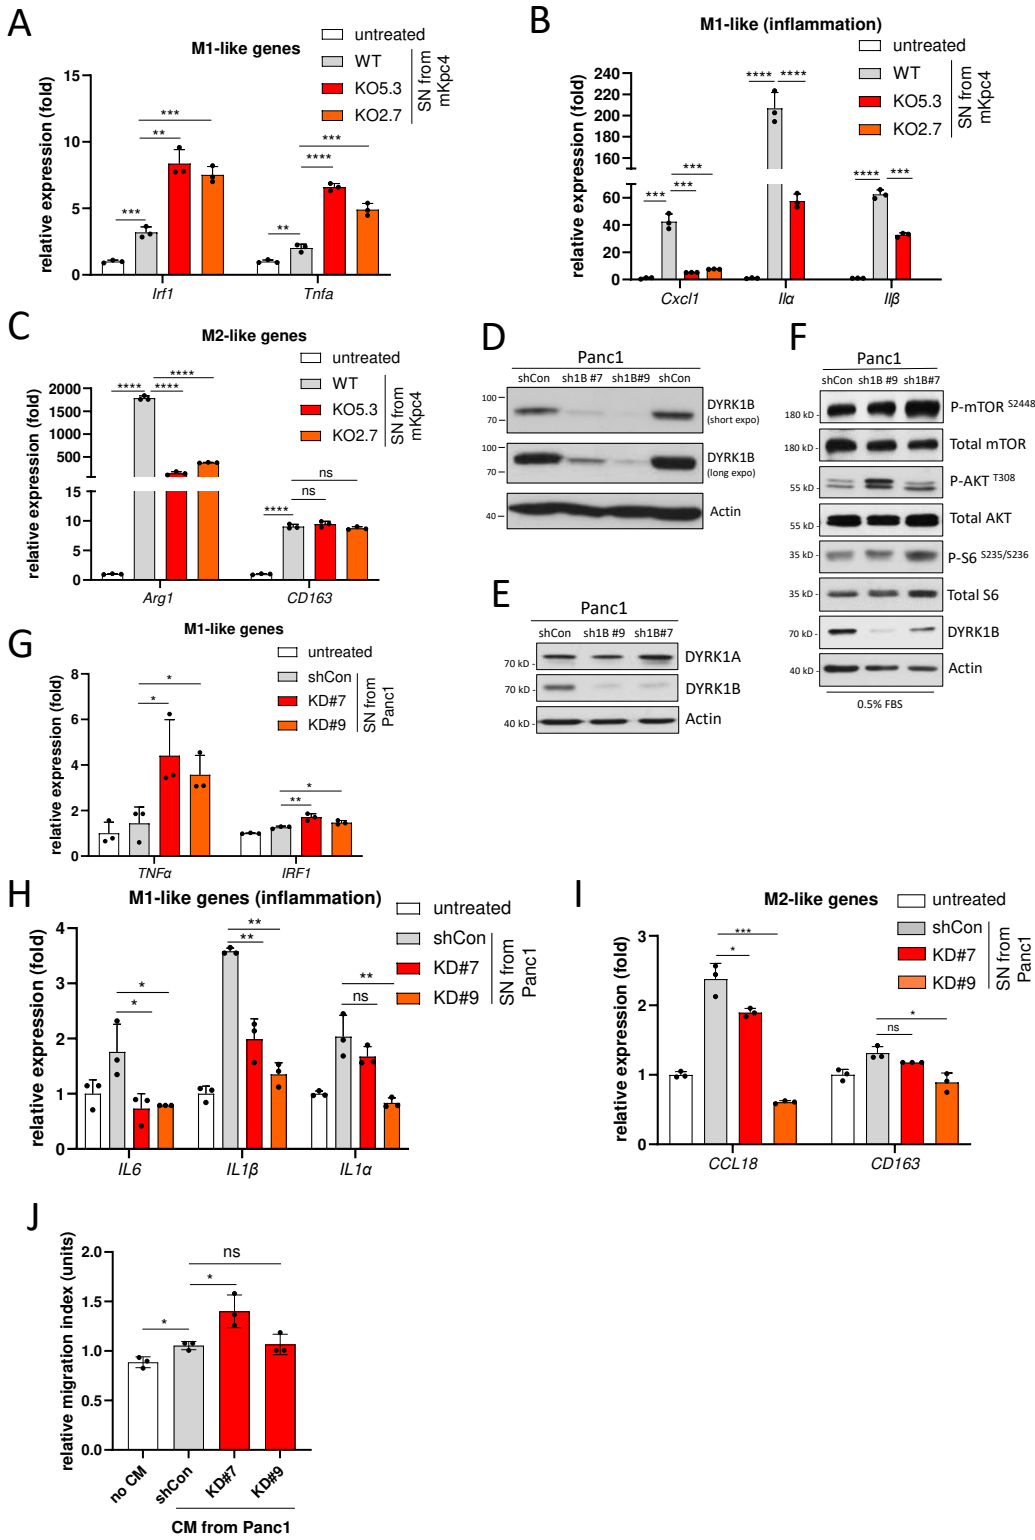

- Figure S4 -

Supplement: gutjnl-2023-331854supp005_data_supplement.pdf [file gutjnl-2023-331854supp005_data_supplement.pdf]

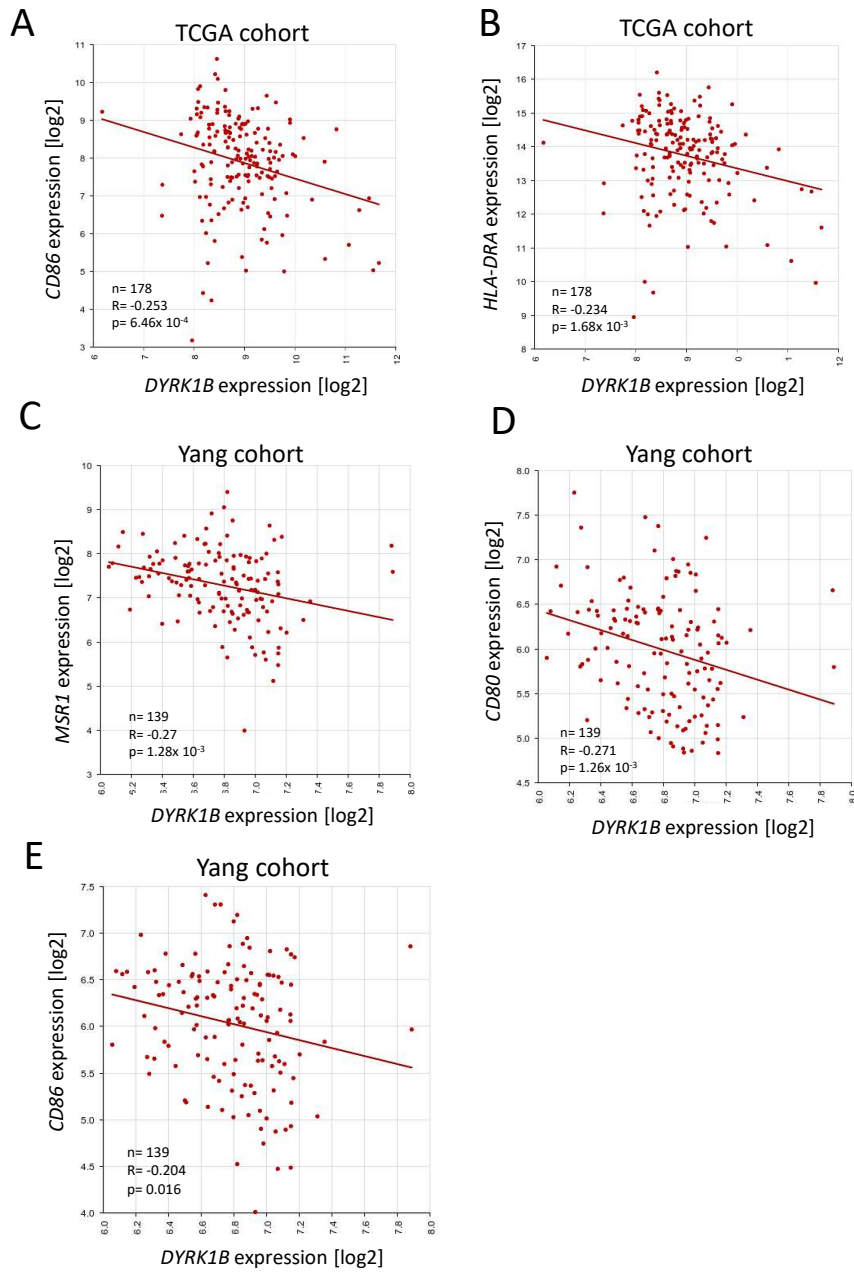

- Figure S7 -

Supplement: gutjnl-2023-331854supp008_data_supplement.pdf [file gutjnl-2023-331854supp008_data_supplement.pdf]
